# Supplementary material
Source: PubMed Central journal article supplement (PMC7451925)
Supplement: mmc1.pdf [file mmc1.pdf]

**Biophysical Journal, Volume 119**

**Supplemental Information**

**Phase Separation of Toxic Dipeptide Repeat Proteins Related to  
C9orf72 ALS/FTD**

**Hamidreza Jafarinia, Erik van der Giessen, and Patrick R. Onck**

|    |                                                                                                  |    |
|----|--------------------------------------------------------------------------------------------------|----|
| 31 | Table of Contents                                                                                |    |
| 32 |                                                                                                  |    |
| 33 | <b>Coarse-grained force field</b> .....                                                          | 3  |
| 34 | <b>Simulations</b> .....                                                                         | 4  |
| 35 | <b>Protein sequences</b> .....                                                                   | 7  |
| 36 | <b>Supplementary figures</b> .....                                                               | 8  |
| 37 | <b>Figure S1: Coarse-grained force field</b> .....                                               | 8  |
| 38 | <b>Figure S2: Contribution of the backbone potentials to the size of the R-DPRs</b> .....        | 10 |
| 39 | <b>Figure S3: Comparison of the hydrodynamic radius of Proline-Arginine chains</b> .....         | 11 |
| 40 | <b>Figure S4: Phase separation of poly-GA</b> .....                                              | 12 |
| 41 | <b>Figure S5: Length- and concentration-dependent phase separation of poly-GA</b> .....          | 13 |
| 42 | <b>Figure S6: Radial density profiles for GA<sub>100</sub> droplets</b> .....                    | 14 |
| 43 | <b>Figure S7: Number of free molecules of poly-GA at equilibrium</b> .....                       | 15 |
| 44 | <b>Figure S8: R-DPRs phase separation in the presence of poly-D</b> .....                        | 16 |
| 45 | <b>Figure S9: PMF calculation for binding of R-DPRs to poly-D</b> .....                          | 17 |
| 46 | <b>Figure S10: NCPR plots and poly-PR binding to the disordered regions of NCL and NPM1</b> . 18 |    |
| 47 | <b>Figure S11: Slab density profiles for phase separation of poly-PR with poly-D</b> .....       | 19 |
| 48 | <b>Figure S12: Comparison of the phase diagrams of poly-PR and poly-GR</b> .....                 | 20 |
| 49 | <b>Supplementary tables</b> .....                                                                | 21 |
| 50 | <b>Table S1: The relative hydrophobic strength values of charged residues</b> .....              | 21 |
| 51 | <b>Table S2: Time-averaged exchange rates</b> .....                                              | 22 |
| 52 | <b>Supplementary movies</b> .....                                                                | 23 |
| 53 | <b>Supporting references</b> .....                                                               | 23 |
| 54 |                                                                                                  |    |
| 55 |                                                                                                  |    |
| 56 |                                                                                                  |    |
| 57 |                                                                                                  |    |
| 58 |                                                                                                  |    |
| 59 |                                                                                                  |    |
| 60 |                                                                                                  |    |
| 61 |                                                                                                  |    |
| 62 |                                                                                                  |    |
| 63 |                                                                                                  |    |

## 64 Coarse-grained force field

65 **Update of the 1BPA coarse-grained force field.** The 1BPA implicit solvent force field has been used  
66 before to study intrinsically disordered FG-Nups and nucleocytoplasmic transport (1-3). The bonded  
67 interactions, i.e. bending and torsion potentials, in this force field are residue and sequence specific. This  
68 force field, interestingly, differentiates between the bending and torsion potentials of Glycine, Proline,  
69 and other residues. This feature is highly important since DPRs are rich in Proline and Glycine and it  
70 has been shown that these two residues contribute to the rigidity and flexibility of an IDP (4-7).  
71 Therefore, using the 1BPA model enables us to distinguish between the properties of poly-PR and poly-  
72 GR and to obtain more accurate results for poly-GA. The 1BPA also accounts for the  
73 hydrophobic/hydrophilic and electrostatic interactions between different amino acids, polarity of the  
74 solvent and screening of free ions. This force field uses the average of several residue-based  
75 hydrophobicity scales to describe the effective interactions between the amino acids. The hydrophobic  
76 interactions in this force field have been calibrated against the experimentally known  $R_h$  values of FG-  
77 Nup segments (8). For Proline and Glycine the interaction parameters have also been fine-tuned using  
78 the end-to-end distance and radius of gyration of poly-Proline (9) and poly-Glycine segments (10) which  
79 makes the 1BPA a proper choice for investigating the properties of DPRs.

80 The majority of FG-Nup segments, however, contain less than 0.6% of Arginine (R) (see the pink shaded  
81 band in Fig. S1). For the ones with more than 0.6% of R a correlation can be observed between the R  
82 content and the  $R_h$  error (see black dashed line in Fig. S1a) showing that there is still room for improving  
83 the R interaction with other residues in the 1BPA force field. To achieve this we further fine-tune the  
84 relative hydrophobic strength  $\varepsilon_i$  of R. The  $\varepsilon_i$  value is a residue-specific parameter that ranges between  
85 0 and 1 and is close to 0 for hydrophilic polar residues. Since we also study the interaction of R-DPRs  
86 with acidic molecules, we recalibrate the  $\varepsilon_i$  values of all charged residues, i.e. RDEK. The aim is to  
87 obtain an updated 1BPA force field that is more accurate for studying the properties of R-DPRs and  
88 their interaction with negatively-charged molecules.

89 To update the 1BPA force field we slightly increase the  $\varepsilon_i$  values of charged residues to 0.005 (see Table  
90 S1), thus reducing the  $R_h$  error for all the six FG-Nup segments with R content  $> 0.6\%$  (see Fig. S1a).  
91 This choice of parameter for the relative hydrophobic strength of charged residues gives the best results  
92 in terms of the total average error and the minimum largest error in our calibration simulations with 16  
93 FG-Nup segments presented here and originally used for the calibration of 1BPA (2). The total average  
94 and the largest errors are found to be 8.3% and 21.1% in the 1BPA force field, and 7.5% and 17.1% in  
95 the updated 1BPA force field. The correlation mentioned earlier for an R content  $> 0.6\%$  still exists in  
96 the updated 1BPA (red dashed line in Fig. S1a) which might be due to the absence of cation- $\pi$   
97 interactions between R and residues with aromatic rings in our force field. However, this has no effect  
98 on our simulation results since the DPRs and acidic molecules studied in this work contain no aromatic  
99 residues. A direct comparison between the two force fields is presented in Fig. S1b. At physiological

100 intracellular pH between 7 and 7.4, i.e more than three pH units away from the  $pK_a$  values of Arginine  
101 and Aspartic acid, we assume R, D, E, and K to be fully charged (11).

102 **Complex coacervation of R-DPRs.** The complex coacervation of polyelectrolytes is driven by a  
103 combination of enthalpic and entropic effects (12). Coulombic energy change and counterion release  
104 entropy are the main contributors to the free energy of complexation (13). In our single-molecule and  
105 phase separation simulations of R-DPRs with stretches of acidic amino acids, we account for the  
106 screening effect of ions, but similar to previous theoretical (14, 15) and coarse-grained models (16, 17)  
107 used to study complex coacervation, the effect of counterion condensation has not been considered in  
108 our modeling. Despite this limitation, our simulations capture the experimentally observed length-  
109 dependence of  $\rho_L$  (concentration of the dilute phase) and  $\rho_H$  (concentration of the condensed phase) for  
110 polyelectrolytes (18). Here we compare the effect of Coulomb energy change and counterion release  
111 entropy for the complexation of R-DPRs with acidic molecules by calculating the Coulomb strength  
112 parameter as suggested by Ou and Muthukumar (13). In their study the Coulomb strength parameter  $\Gamma$   
113 has been defined as

$$114 \quad \Gamma = \frac{l_B}{l_0}.$$

115 Here  $l_B = e^2/4\pi\epsilon_0\epsilon_r k_B T$  is the Bjerrum length, where  $e$  is the elementary charge,  $\epsilon_0$  is the vacuum  
116 permittivity,  $\epsilon_r$  is the relative permittivity,  $k_B$  is the Boltzmann constant,  $T$  is the absolute temperature  
117 and  $l_0$  is the charge separation distance along a polymer chain. For  $\Gamma < 1$  the entropic term is negligible  
118 and the complexation is driven by the change in the Coulomb energy, but for  $\Gamma > 1$  the entropic term  
119 starts to play a more important role, for  $\Gamma < 1.5$  the electrostatic attraction between the oppositely-  
120 charged polyelectrolytes still predominantly drives the complexation, while the counterion release  
121 entropy only plays a subsidiary role. For  $\Gamma > 1.5$ , the contribution of the entropic term becomes more  
122 significant, until at  $\Gamma = 2.5$  the complexation is completely driven by counterion release entropy (13).

123 The charge separation distance  $l_0$  is 0.76 nm (two times the bond length) for R-DPRs, and 0.38 nm (the  
124 bond length) for acidic molecules. Using the average  $l_0 = (0.76 + 0.38)/2 = 0.57$  and  $l_B \simeq 0.7$  nm  
125 for water at 300 K, the Coulomb interaction parameter is found to be  $\Gamma = 1.23$  that lies in the range  
126 where the Coulomb energy change plays a more significant role than the counterion release entropy,  
127 supporting our assumption to neglect the effect of counterion condensation.

## 128 **Simulations**

129 **Single-molecule simulations.** Langevin dynamics simulations are performed at 300 K and  
130 physiological salt concentration of 150 mM in NVT ensembles with a time-step of 0.02 ps and a  
131 Langevin friction coefficient of  $0.02 \text{ ps}^{-1}$  using GROMACS version 2016. Each simulation is performed  
132 for  $3 \mu\text{s}$  and the last  $1 \mu\text{s}$  is used to obtain the  $\rho_L$  and  $R_g$ . The Hydro++ program (19) is used to obtain

133 the  $R_h$  values from the trajectories. The fits for  $R_h$  in Fig. 1b are according to  $bN^\nu$ . For  $R_g$  we use the  
 134 following equation for the fits in Fig. 1c (20):

$$135 \quad R_g = \sqrt{\frac{2l_p^*b}{(2\nu+1)(2\nu+2)}} N^\nu,$$

136 Where  $b = 0.38$  nm and  $l_p^* = 0.40 \pm 0.07$  nm. The errors represent the changes in the scaling  
 137 exponents for  $0.33 < l_p^* < 0.47$ .

138 The asphericity in Fig. 1d is calculated using the following equation(21):

$$139 \quad \text{Asphericity} = 1 - 3 \left\langle \frac{\lambda_1\lambda_2 + \lambda_2\lambda_3 + \lambda_3\lambda_1}{(\lambda_1 + \lambda_2 + \lambda_3)^2} \right\rangle$$

140 Where  $\lambda_{1,2,3}$  are the eigenvalues of the gyration tensor. Asphericity is zero for a perfect sphere and is 1  
 141 for a perfect rod.

142 **Droplet simulations and cluster size distribution analysis.** Although the slab method can minimize  
 143 the finite size effects and produce reliable values for the concentrations of the two phases, this method  
 144 is not suitable for investigating the properties of the droplets such as the nucleation process, droplet size  
 145 and interaction between droplets. Due to these limitations we also study the 3D droplet formation of  
 146 DPRs. To perform droplet simulations the DPRs are placed in a cubic box of size 80 nm and then  
 147 simulated for  $\approx 3 \mu\text{s}$  which is sufficient to reach the equilibrium state (Figs. 2a left panels, 3b, S4-S8).  
 148 At equilibrium the number of the residues inside the condensed phase (droplet) and the radial density  
 149 profile measured from the center of the droplet (e.g. Fig. S6) are well-converged. In our test simulations  
 150 we observed no significant effect of the initial distribution of the molecules on the properties of the  
 151 resulting droplets at equilibrium. The radial density profiles (Figs. 3c, S6) and cluster size distribution  
 152 plots (Figs. S4a, S5) are time-averaged for at least  $1 \mu\text{s}$  at equilibrium. Discrete cells of thickness 1 nm  
 153 are used to obtain the radial density profiles. From the radial density profiles, one can obtain values of  
 154  $\rho_H$  from the flat region close to the center of the droplet, and  $\rho_L$  from the region far from the droplet.  
 155 However, to minimize the finite-size effects (22), we use slab method (see the next subsection ‘Slab  
 156 simulations’) to obtain  $\rho_H$  and  $\rho_L$ . The droplet radius is obtained from the radial density profile and is  
 157 the average position of the first point close to the low-density region with  $|d\rho/dr| \leq 2 - 5$  mg/ml/nm  
 158 (see dashed lines in Figs. 3c, S6). This term is the absolute value of the slope of the density profile which  
 159 is close to zero where the density profile reaches the dilute phase region. Note that using  $|d\rho/dr| \approx$   
 160  $0$  mg/ml/nm gives unrealistically large values for the droplet radius. We performed a sensitivity  
 161 analysis for the critical value of  $|d\rho/dr|$  and observed that selecting slope limits between 2-5 mg/ml/nm  
 162 results in a maximal change of 4% for all computed values for the droplet radius.

163 To generate the cluster size distribution plots in Figs. S4 and S5, two chains are considered to be in the  
164 same cluster if at least two residues of those chains come closer than 0.7 nm (23). In our cluster size  
165 distribution plots (Fig. S4a and S5) the horizontal axis is the logarithm of the number of residues inside  
166 a cluster ( $S$ ) and the vertical axis is the logarithm of the time-averaged number of the clusters ( $N_C$ ).  
167 When phase separation occurs the curves are divided into two regions, a dilute phase containing free  
168 molecules and small clusters, and a condensed phase that exchanges molecules with the dilute phase.

169 **Slab simulations.** The initial simulations are performed in cubic boxes of size 20 nm for poly-GA and  
170 25 nm for more extended R-DPRs. These box sizes ensure no interaction between DPRs and their  
171 periodic images for repeat lengths  $n \leq 100$ . For longer DPRs the box size is increased accordingly. For  
172 the initial equilibration simulations we followed the steps suggested in (24). After equilibration, the box  
173 is enlarged to a 10 times larger size than its initial value in the  $z$  direction which is sufficient to reduce  
174 the finite-size effects and to obtain reliable values for  $\rho_H$  and  $\rho_L$ . The system is then simulated for  $\approx$   
175  $3 \mu\text{s}$  in an NVT ensemble to achieve convergence for the density profiles in the  $z$  direction (Figs. 2b,  
176 S11, S12). The density profiles are calculated using discrete cells of thickness 1 nm and time-averaged  
177 for at least  $1 \mu\text{s}$  at equilibrium. When the system undergoes phase separation, the averaged  
178 concentrations in  $|z| < 4$  nm region is used to obtain  $\rho_H$ . To obtain  $\rho_L$  we use the average concentrations  
179 in  $|z| > 40$  nm for poly-GA (Fig. 2b) and  $|z| > 65$  nm for R-DPRs (Figs. S11, S12). The simulation  
180 parameters are similar to the ones we used in the single-molecule and droplet simulations. From the slab  
181 simulations we also obtain the time-averaged exchange rates based on the fluctuations of the number of  
182 polymer units inside the condensed phases at equilibrium for around  $1 \mu\text{s}$  (Table S1). To obtain the  
183 number of the molecules inside the condensed phases, we use cut-offs of 0.7 (23) and 0.9 nm for poly-  
184 GA and poly-PR+poly-D. We use a larger cut-off value for the second case since the equilibrium  
185 distances between the oppositely-charged residues, determined by both electrostatic and hydrophilic  
186 interactions, are almost 0.2 nm larger than the one for non-charged residues in our coarse-grained force  
187 field (2). To obtain the exchange rates per unit area, we divide the exchange rate by 2 times the  $xy$ -plane  
188 area of the slab box.

189 **Phase diagrams.** The vertical axis in our phase diagram is the DPR repeat length and the horizontal  
190 axis is the concentration (Figs. 2a, 4a, S12). The phase diagram is obtained by connecting values of  $\rho_L$   
191 and  $\rho_H$  computed from the slab simulations. To find the critical point, we begin with the smallest repeat  
192 length  $n_1$  that has produced converged  $\rho_L$  and  $\rho_H$  values. Then we perform slab simulation for repeat  
193 length of  $n_{-1} = n_1 - 10$  to calculate the time-averaged density profile for  $1 \mu\text{s}$  after  $3 \mu\text{s}$  of simulation  
194 time. If the calculated density profile for repeat length  $n_{-1}$  is almost flat, with small fluctuations in  
195 concentration  $\Delta\rho = |\rho_{\text{max}} - \rho_{\text{min}}| < 20$  mg/ml, we report  $(n_1 + n_{-1})/2$  as the critical repeat length.  
196 With this method we estimate the critical repeat length with an error of less than 5 repeats. Choosing  
197 any value larger than 20 mg/ml for  $\Delta\rho$  does not change the critical repeat length. In each phase diagram,

198 for the region close to the critical point, a dashed spline that reaches its minimum at  $(n_1 + n_{-1})/2$ ,  
 199  $(\rho_H(n_1) + \rho_L(n_1))/2$  is shown as a guide to the eye (Figs. 2a, 4a, S12).

200 **Potential of mean force (PMF) calculation.** We use umbrella sampling simulations and the weighted  
 201 histogram analysis method (WHAM) via the gmx wham utility of GROMACS to calculate the PMF  
 202 associated with the binding of R-DPRs to the acidic molecules in Fig. S9. The distance  $r$  between the  
 203 center of masses of two molecules is considered as the reaction coordinate. For each window the  
 204 simulation is conducted for 1  $\mu$ s. We use  $\Delta r = 0.1$  nm for the distance between two windows. For  
 205 details about the umbrella sampling method the reader is referred to (3, 25).

## 206 Protein sequences

207 Sequences of the disordered parts of NPM1 and NCL used in Fig. S10 are listed below. The negatively  
 208 charged residues are shown in blue.

209

|                         |                                                                                                                                                                                                                                                                                                                                                 |
|-------------------------|-------------------------------------------------------------------------------------------------------------------------------------------------------------------------------------------------------------------------------------------------------------------------------------------------------------------------------------------------|
| NPM1 <sub>120-240</sub> | EEDAESDEEEEEEDVKLLSISGKRSAPGGGSKVP<br>QKKVKLAADEDDEDDDDDEEDDDDEDDDDDFD<br>DEEAEEKAPVKKSIRDTPAKNAQKSNQNGKDS<br>KPSSTPRSKGQESFKKQEKTPKTPKG                                                                                                                                                                                                        |
| NCL <sub>1-300</sub>    | MVKLAKAGKNQGDPKKMAPPKVEEEDSEDE<br>EMSEDEEDDSSGEEVVIPQKKGKAAATSACK<br>VVVSPTKKVAVATPAKKA AVTPGKKAATPA<br>KKTVTPAKAVTTPGKKGATPGKALVATPGKK<br>GAAIPAKGAKNGKNAKKEDSDEEEDDDSEEDE<br>EDDEDEDEDEDEIEPAAMKAAAAAPASEDEDD<br>EDDEDEDEDDDDDEEDDSEEEAMETTPAKGKK<br>AAKVVPVKAKNVAEDEDEEEDDEDEDDDDDE<br>DDEDDDEDEDEEEEEEEEEEPVKEAPGKRKKE<br>MAKQKAAPKAKKQKVEG |

210

211

212

213

214

215

216

217

218

219

220 **Supplementary figures**  
 221 **Figure S1: Coarse-grained force field**  
 222

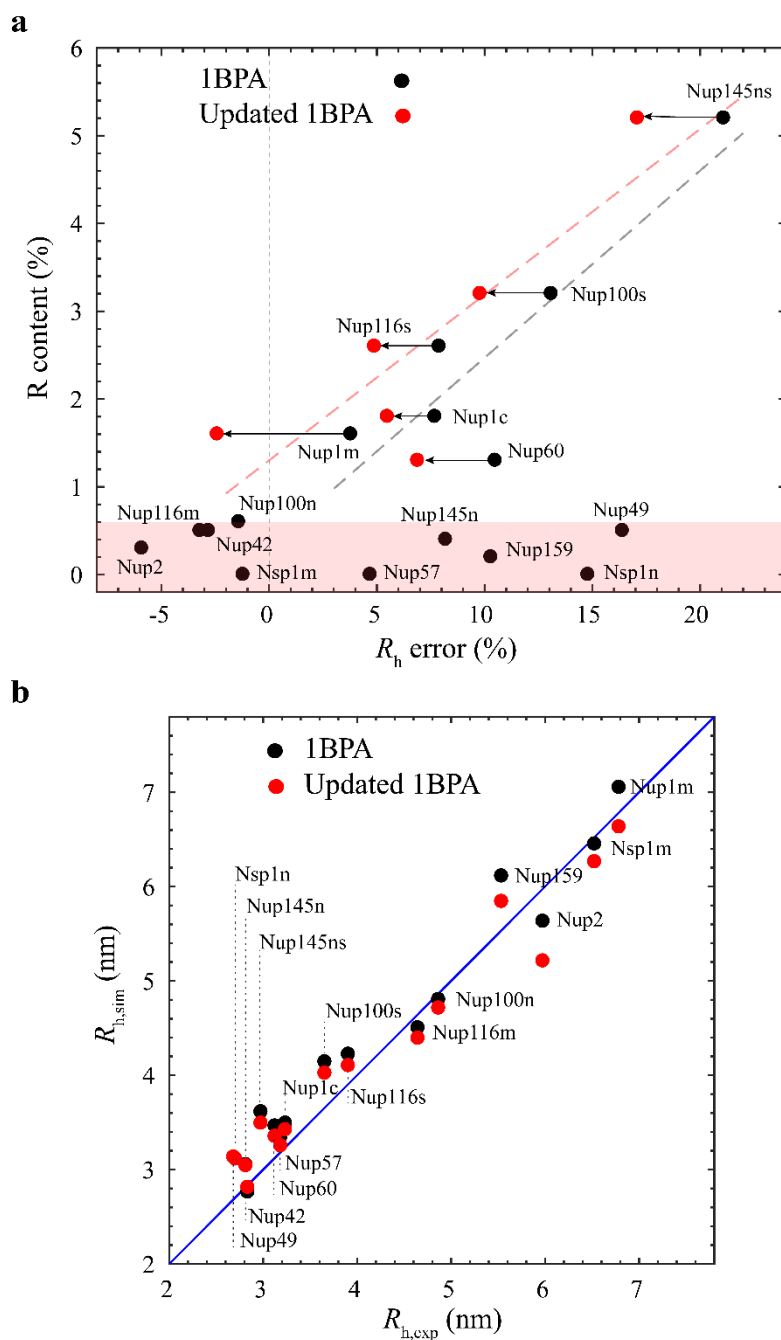

223  
 224 **Figure S1: (a)** Content of Arginine in FG-Nup segments plotted against their corresponding  
 225 hydrodynamic radius error:  $(R_{h,sim} - R_{h,exp})/R_{h,exp}$  for 1BPA and the updated 1BPA force fields.  
 226 The pink shaded band contains FG-Nups with R content < 0.6%. The black dashed line shows the  
 227 correlation between the R content > 0.6% and the  $R_h$  error in 1BPA. In the updated 1BPA force field  
 228 the  $R_h$  error is reduced for all FG-Nups with R content > 0.6%. The red dashed line shows the  
 229 correlation between the R content > 0.6% and the  $R_h$  error in updated 1BPA. **(b)** A direct comparison



230 of the two force fields in predicting the hydrodynamic radius of FG-Nups. The total average and the  
231 largest errors are found to be 8.3% and 21.1% in the 1BPA force field, and 7.5% and 17.1% in the  
232 updated 1BPA force field.

233

234

235

236

237

238

239

240

241

242

243

244

245

246

247

248

249

250

251

252

253

254

255

256

257

258

259

260

261

262 **Figure S2: Contribution of the backbone potentials to the size of the R-DPRs**  
263

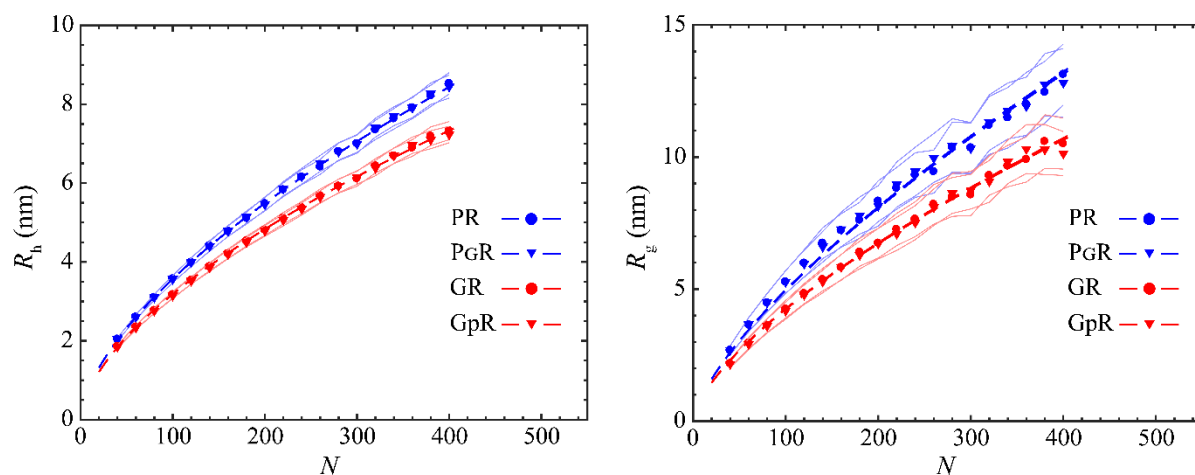

264  
265 **Figure S2:** A comparison between the  $R_h$  and  $R_g$  of poly-PR and -GR (presented in Fig. 1b and 1c) and  
266 poly-PGR and -GPR. P<sub>G</sub> has the backbone rigidity of P and the hydrophobicity of G, G<sub>P</sub> has the backbone  
267 flexibility of G and the hydrophobicity of P. The error regions between the thin lines indicate half of the  
268 standard deviation.

269  
270  
271  
272  
273  
274  
275  
276  
277  
278  
279  
280  
281  
282  
283  
284  
285  
286

287 **Figure S3: Comparison of the hydrodynamic radius of Proline-Arginine chains**  
288

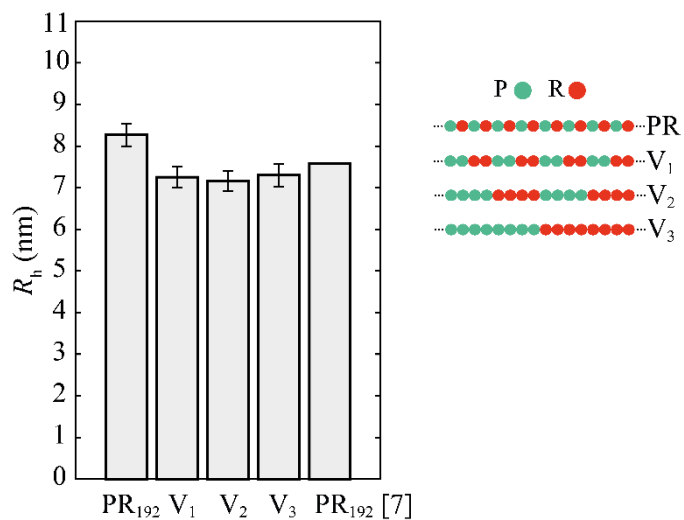

289 **Figure S3:** The  $R_h$  value of poly-PR and three variants with different patterning of the Proline and  
290 Arginine residues. The bar chart at the right has been obtained using the equation reported in (7).  
291

292  
293  
294  
295  
296  
297  
298  
299  
300  
301  
302  
303  
304  
305  
306  
307  
308  
309

310 **Figure S4: Phase separation of poly-GA**  
 311

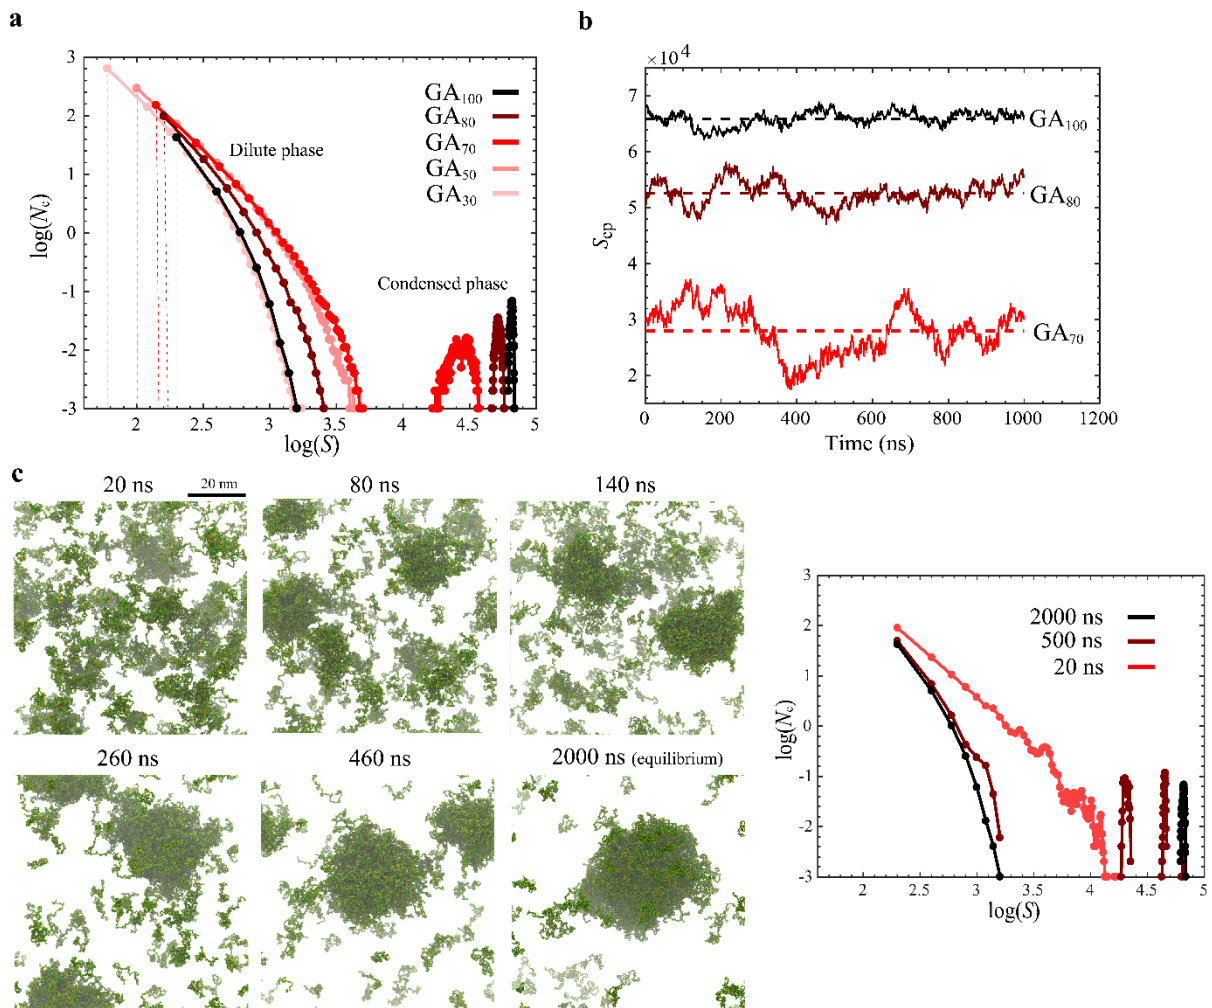

312

313

314 **Figure S4: Phase separation of poly-GA** for a total concentration of 32.2 mg/ml. (a) Cluster size  
 315 distribution of poly-GA  $30 \leq n \leq 100$  at equilibrium.  $S$  is the number of residues inside a cluster and  
 316  $N_c$  is the time-averaged number of the clusters. For comparison, the time-averaged number of free  
 317 molecules is also included in this plot, indicated with a dashed line for each case. (b) The number of  
 318 residues in the condensed phase ( $S_{cp}$ ) plotted against time at equilibrium for GA<sub>100</sub>, GA<sub>80</sub>, and GA<sub>70</sub>.  
 319 Horizontal dashed lines indicate the average values. Longer dipeptides form clusters containing more  
 320 residues with lower exchange with the surrounding. (c) Time evolution for the phase separation of GA<sub>100</sub>  
 321 starting from randomly distributed molecules in a cubic box of size 80 nm (left). A similar cluster size  
 322 distribution analysis as presented in (a) at three different simulation times for GA<sub>100</sub>. For each data set  
 323 the average of the last 20 ns is used.

324

325

326  
327

**Figure S5: Length- and concentration-dependent phase separation of poly-GA**

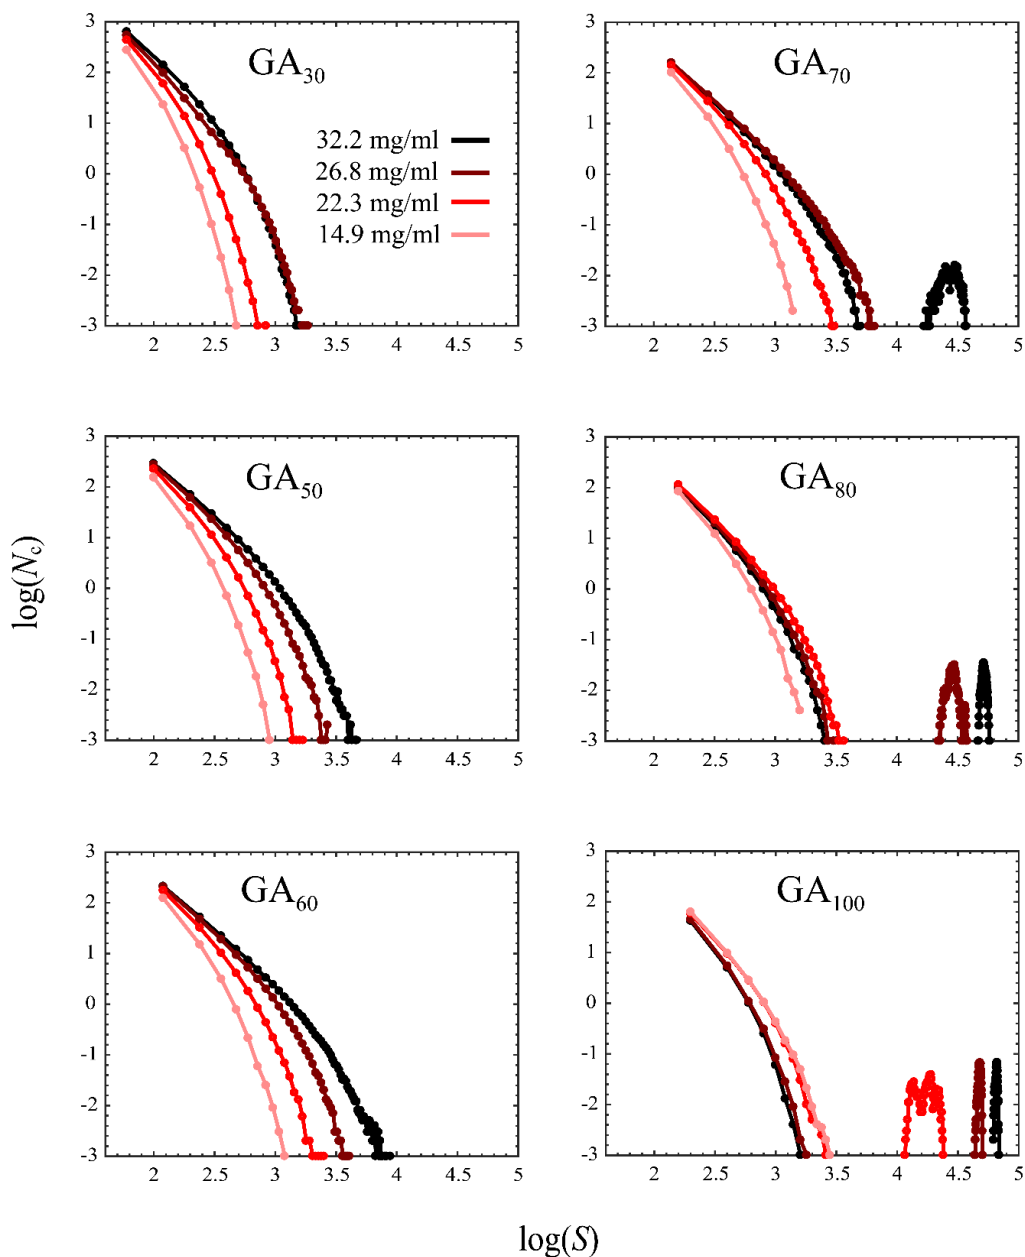

328

329 **Figure S5:** Cluster size distribution analysis of poly-GA at equilibrium for four different total mass  
330 concentrations of 32.2, 26.8, 22.3, and 14.9 mg/ml shows a length- and concentration-dependent phase  
331 separation.  $S$  is the number of residues inside a cluster and  $N_c$  is the time-averaged number of the  
332 clusters. For a fixed repeat length, increasing the concentration increases the average number of the  
333 molecules inside the condensed phase (see the results for  $GA_{80}$  and  $GA_{100}$ ).

334

335

336 **Figure S6: Radial density profiles for GA<sub>100</sub> droplets**  
337

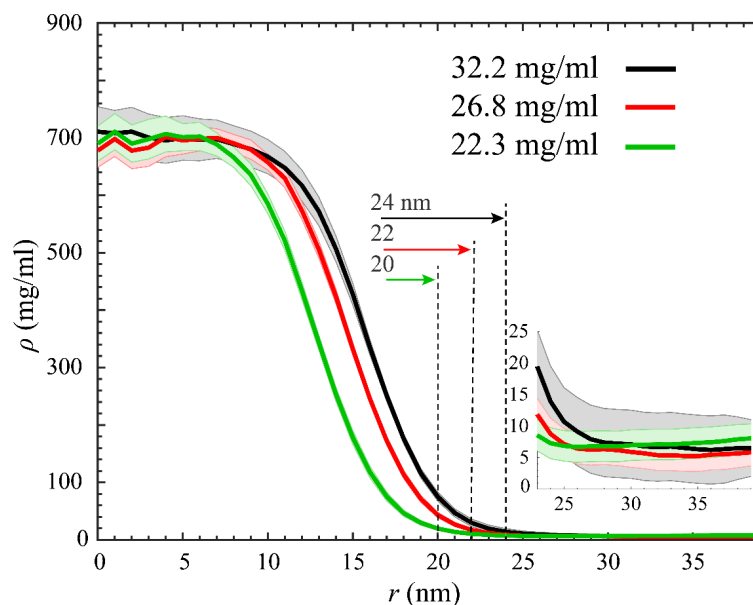

338  
339 **Figure S6:** Radial density profiles for GA<sub>100</sub> droplets for three different total mass concentrations. The  
340 shading indicates half of the standard deviations as error bars. The radius of the droplet is shown with  
341 dashed lines for each case. The inset figure shows the zoomed density profiles for  $r \geq 24$  nm. The size  
342 of the droplet increases with increasing the total mass concentration. However,  $\rho_H$  (the average  
343 concentration for  $r < 4$  nm) and  $\rho_L$  (the average concentration for  $r > 30$  nm) remain unchanged.

344  
345  
346  
347  
348  
349  
350  
351  
352

353 **Figure S7: Number of free molecules of poly-GA at equilibrium**

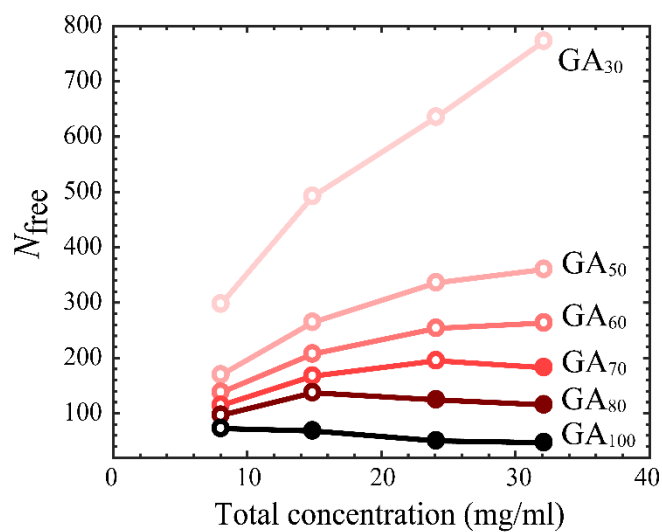

354

355 **Figure S7:** Number of free molecules  $N_{free}$  in the dilute phase plotted against the total concentration  
356 for different lengths of poly-GA. Filled markers are used when poly-GA molecules undergo phase  
357 separation. When phase separation occurs the  $N_{free}$  drops. At a fixed concentration,  $N_{free}$  is higher for  
358 shorter dipeptides. The data in the figure is obtained from the cluster size distribution curves of Fig. S5.

359

360

361

362

363

364

365

366

367

368

369

370

371

372 **Figure S8: R-DPRs phase separation in the presence of poly-D**  
373

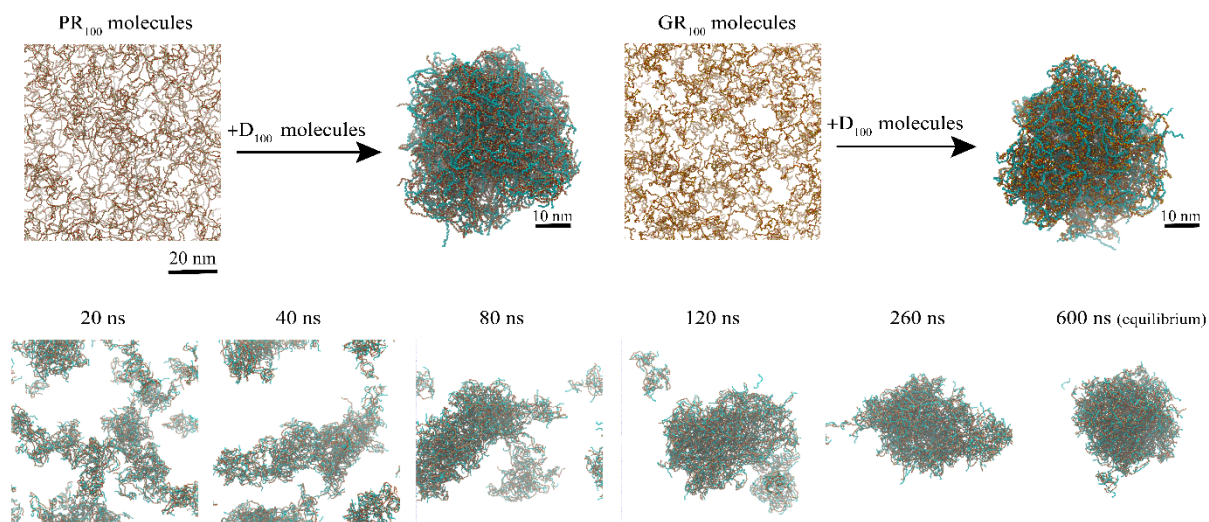

374  
375 **Figure S8:** Long chains of poly-PR and poly-GR are not capable of forming clusters. Adding acidic  
376 molecules (poly-D) induces the phase separation of R-DPRs (top). Time evolution for the phase  
377 separation of PR<sub>100</sub> + D<sub>40</sub> starting from randomly distributed molecules (bottom). The concentration ratios  
378 and the total concentration are  $r_{PR} = r_{GR} = 0.57$  and 14.8 mg/ml for all cases.

379  
380  
381  
382  
383  
384  
385  
386  
387  
388  
389  
390  
391



392 **Figure S9: PMF calculation for binding of R-DPRs to poly-D**  
393

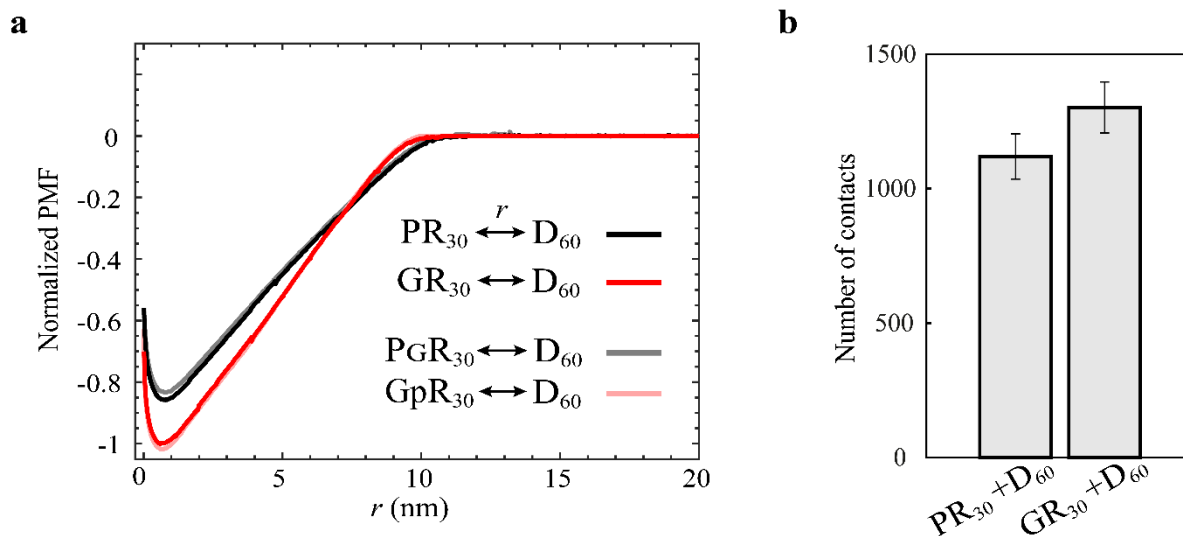

394  
395 **Figure S9: (a)** PMF curves for binding of PR<sub>30</sub> and GR<sub>30</sub> to D<sub>60</sub> indicates a larger free energy of binding  
396 of poly-GR to acidic molecules. The distance between the center of masses of two molecules is indicated  
397 with  $r$ . Due to the more compact conformation of poly-GR, its PMF curve vanishes at slightly shorter  
398 inter-molecule distances. Results for PGR<sub>30</sub> and GpR<sub>30</sub> binding to D<sub>60</sub> show no significant change in the  
399 PMF curves. Note that P<sub>G</sub> has the backbone rigidity of P and the hydrophobicity of G and G<sub>P</sub> has the  
400 backbone flexibility of G and the hydrophobicity of P. All curves are normalized with the depth of the  
401 GR<sub>30</sub>-D<sub>60</sub> binding free energy. **(b)** Time-averaged total number of contacts after binding of PR<sub>30</sub> and  
402 GR<sub>30</sub> to D<sub>60</sub> at equilibrium using a cut-off of 2.5 nm. The contact of one residue in the R-DPRs with one  
403 residue in the acidic molecule is counted as one contact, see Movie S4 for short trajectories.

404  
405  
406  
407  
408  
409  
410  
411  
412  
413

414 **Figure S10: NCPR plots and poly-PR binding to the disordered regions of NCL and NPM1**  
415

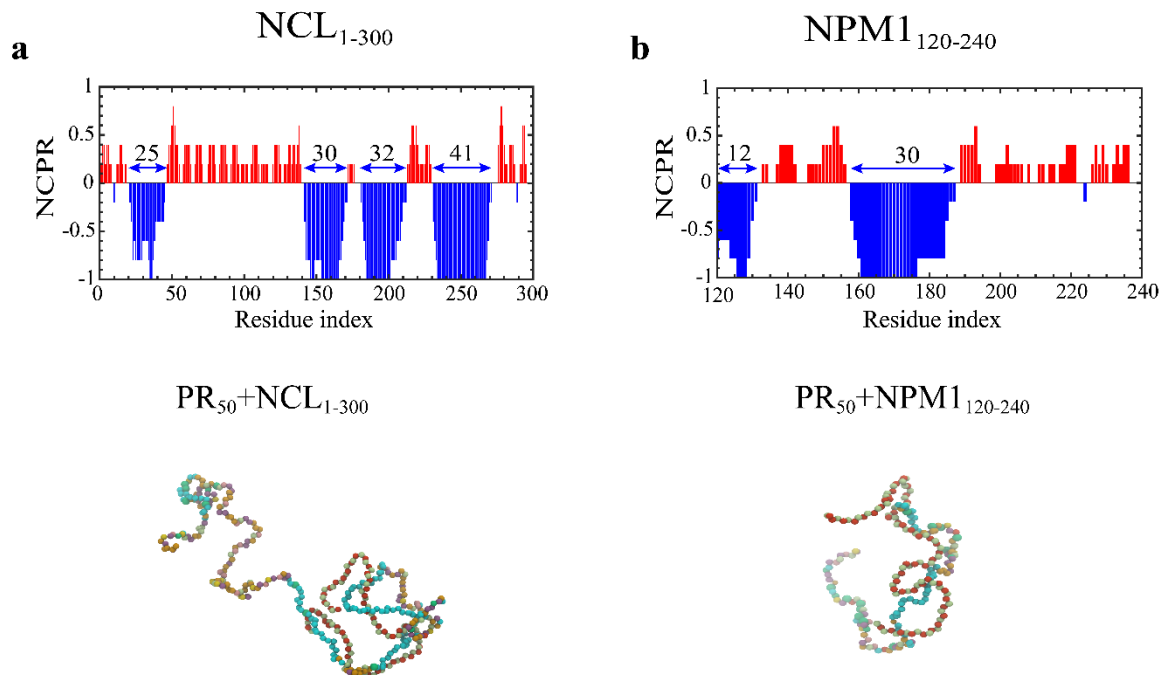

416

417 **Figure S10:** Top: Net charge per residue (NCPR) histograms for disordered parts of two nucleolar  
418 proteins: **(a)** nucleolin (NCL<sub>1-300</sub>) and **(b)** nucleophasmin (NPM1<sub>120-240</sub>). Blue arrows show acidic tracts  
419 with lengths ranging from 12 to 41. To find NCPR we use a sliding window containing 5 residues.  
420 Bottom: snapshots of binding of PR50 to NCL<sub>1-300</sub> and NPM1<sub>120-240</sub>. Acidic tracts are indicated in cyan;  
421 PR chains comprise of red-green colored beads (as in Fig. 1a). The other aminoacids are given a range  
422 of colors according to their aminoacid type.

423

424

425

426

427

428

429

430

431

432 **Figure S11: Slab density profiles for phase separation of poly-PR with poly-D**  
433

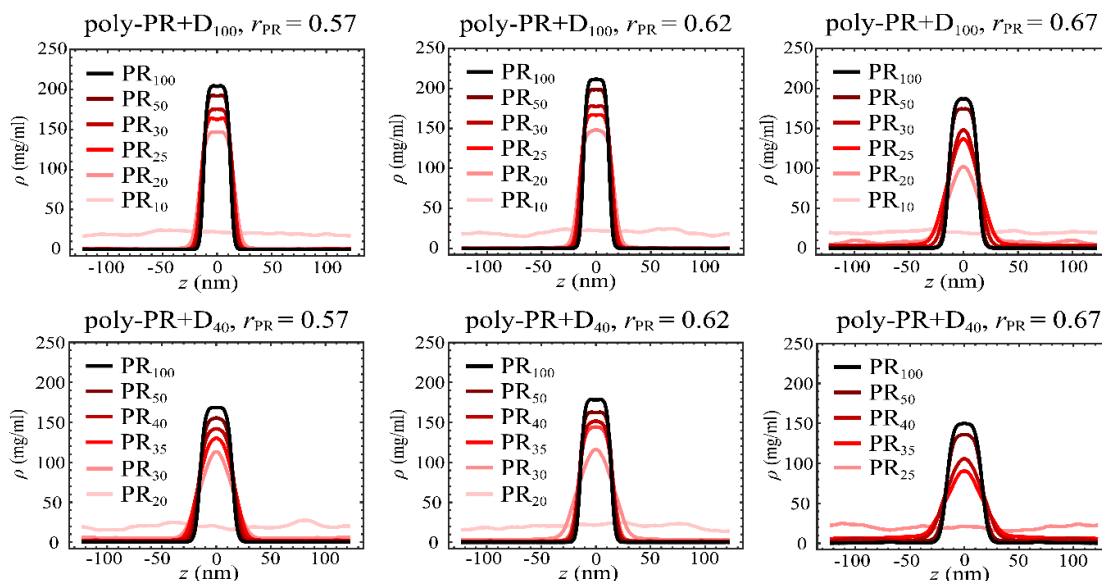

434  
435 **Figure S11: Slab density profiles for phase separation of poly-PR with acidic molecules of lengths 40**  
436 **and 100 for three different concentration ratios of  $r_{PR} = 0.57, 0.62$  and  $0.67$ . These density profiles are**  
437 **used to obtain the coexistence phase diagrams in Fig. 4a.**

438

439

440

441

442

443

444

445

446

447

448

449

450 **Figure S12: Comparison of the phase diagrams of poly-PR and poly-GR**  
 451

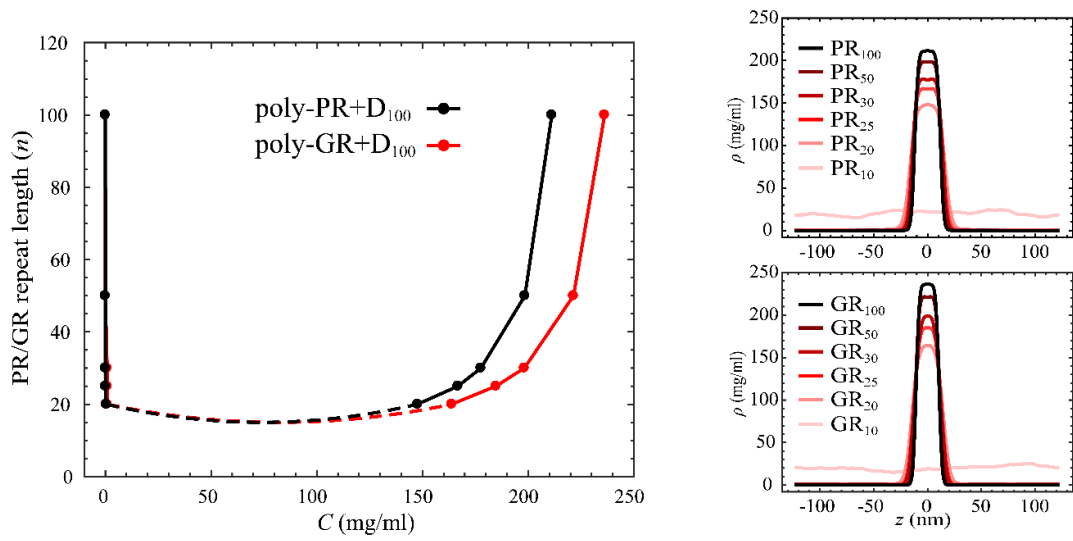

452  
 453 **Figure S12: Coexistence phase diagram (left) and the corresponding slab density profiles (right) for**  
 454 **phase separation of poly-PR and poly-GR with D<sub>100</sub> for  $r_{PR} = r_{GR} = 0.62$ . With the same repeat lengths,**  
 455 **poly-GR forms condensed phases with higher concentrations.**

456  
 457  
 458  
 459  
 460  
 461  
 462  
 463  
 464  
 465  
 466  
 467  
 468

469 **Supplementary tables**

470

471 **Table S1: The relative hydrophobic strength values of charged residues**

472

| Amino acid                     | R     | D      | E      | K      |
|--------------------------------|-------|--------|--------|--------|
| $\varepsilon_i$ (1BPA)         | 0     | 0.0005 | 0.0005 | 0.0005 |
| $\varepsilon_i$ (updated 1BPA) | 0.005 | 0.005  | 0.005  | 0.005  |

473

474 **Table S1:** The relative hydrophobic strength  $\varepsilon_i$  values of charged residues in the 1BPA force field (1,  
475 2) and updated 1BPA force field (the current paper).

476

477

478

479

480

481

482

483

484

485

486

487

488

489

490

491

492

493 **Table S2: Time-averaged exchange rates**  
 494

| Poly-GA repeat length | Exchange rate (ns <sup>-1</sup> ) | Exchange rate per unit area ×10 <sup>4</sup> (ns <sup>-1</sup> nm <sup>-2</sup> ) | Poly-PR repeat length | Exchange rate (ns <sup>-1</sup> ) | Exchange rate per unit area ×10 <sup>4</sup> (ns <sup>-1</sup> nm <sup>-2</sup> ) |
|-----------------------|-----------------------------------|-----------------------------------------------------------------------------------|-----------------------|-----------------------------------|-----------------------------------------------------------------------------------|
| 55                    | 4.01                              | 50.19                                                                             | 30                    | 4.71                              | 37.72                                                                             |
| 60                    | 3.33                              | 41.69                                                                             | 35                    | 2.38                              | 19.04                                                                             |
| 70                    | 1.63                              | 20.32                                                                             | 40                    | 1.56                              | 12.47                                                                             |
| 80                    | 0.94                              | 11.76                                                                             | 50                    | 0.43                              | 3.41                                                                              |
| 100                   | 0.37                              | 4.63                                                                              | 100                   | 0.02                              | 0.14                                                                              |

495

496 **Table S2:** The exchange rates between the condensed and dilute phases of poly-GA and poly-PR with  
 497 different repeat lengths using the slab simulations presented in Fig. 2 and Fig. 4. The details are provided  
 498 in the section ‘Simulations’ of the supplementary information. For poly-PR the exchange rates are  
 499 reported for poly-PR phase separation with  $D_{40}$  and  $\tau_{PR} = 0.62$ .

500

501

502

503

504

505

506

507

508

509

510

511

512

## 513 **Supplementary movies**

514

515 **Movie S1:** Phase separation of GA<sub>70</sub> (left), GA<sub>100</sub> (middle) and GA<sub>140</sub> (right). For better visualization,  
516 in each simulation, 10 random molecules of poly-GA are indicated in red.

517 **Movie S2:** Single-molecule simulation of PR<sub>20</sub> (left), GR<sub>20</sub> (middle), and GA<sub>20</sub> (right).

518 **Movie S3:** Fusion of two liquid droplets formed by PR<sub>100</sub> and D<sub>40</sub> with a poly-PR concentration ratio of  
519  $r_{PR} = 0.57$ .

520 **Movie S4:** Binding of PR<sub>30</sub> (left) and GR<sub>30</sub> (right) to D<sub>60</sub>.

521

## 522 **Supporting references**

523

524 1. Ghavami, A., E. van der Giessen, and P. R. Onck. 2013. Coarse-Grained Potentials for Local  
525 Interactions in Unfolded Proteins. *J. Chem. Theory Comput.* 9(1):432-440.

526 2. Ghavami, A., L. M. Veenhoff, E. Van Der Giessen, and P. R. Onck. 2014. Probing the  
527 disordered domain of the nuclear pore complex through coarse-grained molecular dynamics  
528 simulations. *Biophys. J.* 107(6):1393-1402.

529 3. Ananth, A. N., A. Mishra, S. Frey, A. Dwarkasing, R. Versloot, E. van der Giessen, D. Görlich,  
530 P. Onck, and C. Dekker. 2018. Spatial structure of disordered proteins dictates conductance and  
531 selectivity in nuclear pore complex mimics. *eLife* 7:1-24.

532 4. Cheng, S., M. Cetinkaya, and F. Gräter. 2010. How sequence determines elasticity of disordered  
533 proteins. *Biophys. J.* 99(12):3863-3869.

534 5. Martin, E. W., A. S. Holehouse, C. R. Grace, A. Hughes, R. V. Pappu, and T. Mittag. 2016.  
535 Sequence Determinants of the Conformational Properties of an Intrinsically Disordered Protein  
536 Prior to and upon Multisite Phosphorylation. *J. Am. Chem. Soc.* 138(47):15323-15335.

537 6. Wang, J., J. M. Choi, A. S. Holehouse, H. O. Lee, X. Zhang, M. Jahnel, S. Maharana, R.  
538 Lemaitre, A. Pozniakovsky, D. Drechsel, I. Poser, R. V. Pappu, S. Alberti, and A. A. Hyman.  
539 2018. A Molecular Grammar Governing the Driving Forces for Phase Separation of Prion-like  
540 RNA Binding Proteins. *Cell* 174(3):688-699.e616.

541 7. Marsh, J. A., and J. D. Forman-Kay. 2010. Sequence Determinants of Compaction in  
542 Intrinsically Disordered Proteins. *Biophys. J.* 98(10):2383-2390.

543 8. Yamada, J., J. L. Phillips, S. Patel, G. Goldfien, A. Calestagne-Morelli, H. Huang, R. Reza, J.  
544 Acheson, V. V. Krishnan, S. Newsam, A. Gopinathan, E. Y. Lau, M. E. Colvin, V. N. Uversky,  
545 and M. F. Rexacha. 2010. A bimodal distribution of two distinct categories of intrinsically  
546 disordered structures with separate functions in FG nucleoporins. *Mol. Cell. Proteomics*  
547 9(10):2205-2224.

548 9. Schuler, B., E. A. Lipman, P. J. Steinbach, M. Kumkell, and W. A. Eaton. 2005. Polyproline  
549 and the "spectroscopic ruler" revisited with single-molecule fluorescence. *Proc. Natl. Acad. Sci.*  
550 U.S.A. 102(8):2754-2759.

- 551 10. Ohnishi, S., H. Kamikubo, M. Onitsuka, M. Kataoka, and D. Shortle. 2006. Conformational  
552 Preference of Polyglycine in Solution to Elongated Structure. *J. Am. Chem. Soc.*  
553 128(50):16338-16344.
- 554 11. Perry, S. L., L. Leon, K. Q. Hoffmann, M. J. Kade, D. Priftis, K. A. Black, D. Wong, R. A.  
555 Klein, C. F. Pierce, K. O. Margossian, J. K. Whitmer, J. Qin, J. J. De Pablo, and M. Tirrell.  
556 2015. Chirality-selected phase behaviour in ionic polypeptide complexes. *Nat. Commun.*  
557 6(1):1-8.
- 558 12. Overbeek, J. T. G., and M. J. Voorn. 1957. Phase separation in polyelectrolyte solutions. Theory  
559 of complex coacervation. *J. Cell. Comp. Physiol.* 49(S1):7-26.
- 560 13. Ou, Z., and M. Muthukumar. 2006. Entropy and enthalpy of polyelectrolyte complexation:  
561 Langevin dynamics simulations. *J. Chem. Phys.* 124(15):154902-154902.
- 562 14. Lin, Y. H., J. P. Brady, J. D. Forman-Kay, and H. S. Chan. 2017. Charge pattern matching as a  
563 'fuzzy' mode of molecular recognition for the functional phase separations of intrinsically  
564 disordered proteins. *New Journal of Physics* 19(11):115003-115003.
- 565 15. Lin, Y. H., and H. S. Chan. 2017. Phase Separation and Single-Chain Compactness of Charged  
566 Disordered Proteins Are Strongly Correlated. *Biophys. J.* 112(10):2043-2046.
- 567 16. Das, S., A. N. Amin, Y. H. Lin, and H. S. Chan. 2018. Coarse-grained residue-based models of  
568 disordered protein condensates: Utility and limitations of simple charge pattern parameters.  
569 *PCCP* 20(45):28558-28574.
- 570 17. Boeynaems, S., A. S. Holehouse, V. Weinhardt, D. Kovacs, J. Van Lindt, C. Larabell, L. V. D.  
571 Bosch, R. Das, P. S. Tompa, R. V. Pappu, and A. D. Gitler. 2019. Spontaneous driving forces  
572 give rise to protein–RNA condensates with coexisting phases and complex material properties.  
573 *Proc. Natl. Acad. Sci. U.S.A.* 116(16):7889-7898.
- 574 18. Spruijt, E., A. H. Westphal, J. W. Borst, M. A. Cohen Stuart, and J. van der Gucht. 2010. Binodal  
575 Compositions of Polyelectrolyte Complexes. *Macromolecules* 43(15):6476-6484.
- 576 19. Garcia de la Torre, J., S. Navarro, M. C. Lopez Martinez, F. G. Diaz, and J. J. Lopez Cascales.  
577 1994. HYDRO: a computer program for the prediction of hydrodynamic properties of  
578 macromolecules. *Biophys. J.* 67(2):530-531.
- 579 20. Hofmann, H., A. Soranno, A. Borgia, K. Gast, D. Nettels, and B. Schuler. 2012. Polymer scaling  
580 laws of unfolded and intrinsically disordered proteins quantified with single-molecule  
581 spectroscopy. *Proc. Natl. Acad. Sci. U.S.A.* 109(40):16155-16160.
- 582 21. Mao, A. H., S. L. Crick, A. Vitalis, C. L. Chicoine, and R. V. Pappu. 2010. Net charge per  
583 residue modulates conformational ensembles of intrinsically disordered proteins. *Proc. Natl.*  
584 *Acad. Sci. U.S.A.* 107(18):8183-8188.
- 585 22. Dignon, G. L., W. Zheng, R. B. Best, Y. C. Kim, and J. Mittal. 2018. Relation between single-  
586 molecule properties and phase behavior of intrinsically disordered proteins. *Proceedings of the*  
587 *National Academy of Sciences* 115(40):9929.
- 588 23. Ghavami, A., E. Van der Giessen, and P. R. Onck. 2018. Sol–gel transition in solutions of FG-  
589 Nups of the nuclear pore complex. *Extreme Mechanics Letters* 22:36-41.
- 590 24. Dignon, G. L., W. Zheng, Y. C. Kim, R. B. Best, and J. Mittal. 2018. Sequence determinants of  
591 protein phase behavior from a coarse-grained model. *PLoS Comp. Biol.* 14(1):e1005941-  
592 e1005941.



593 25. Ghavami, A., E. van der Giessen, and P. R. Onck. 2016. Energetics of Transport through the  
594 Nuclear Pore Complex. PLoS One 11(2):e0148876-e0148876.

595
